# Supplementary material for: Machine Learning Approaches to Identify Patient Comorbidities and Symptoms That Increased Risk of Mortality in COVID-19
Source: MDPI journal article supplement (doi:10.3390/diagnostics11081383), 2021-07-31
Supplement: s1 [file s1]

## A. Fever

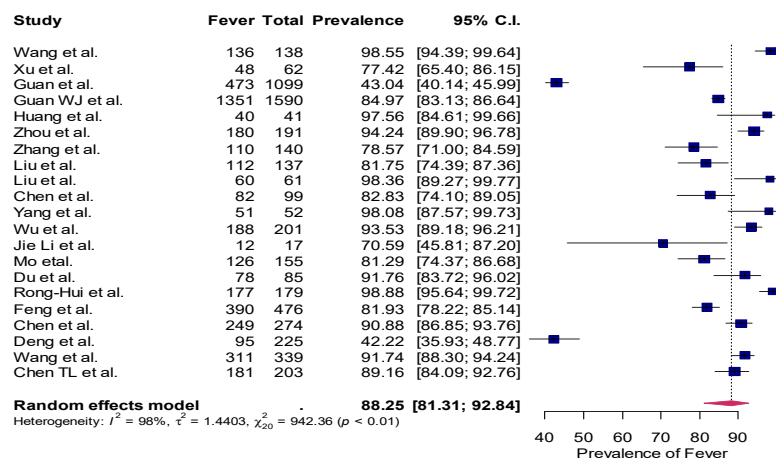

## B. Cough

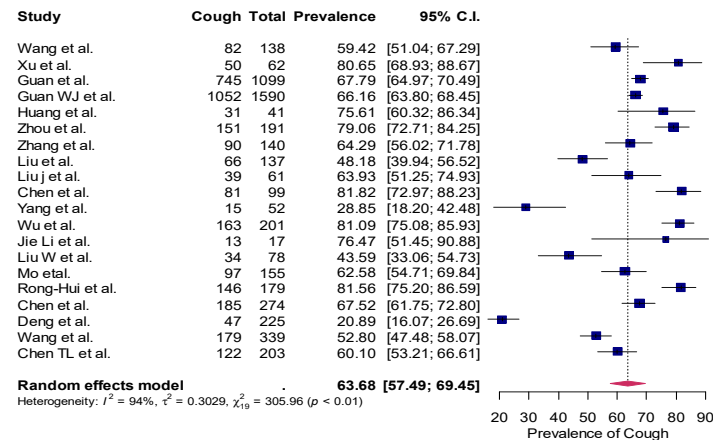

## C. Fatigue

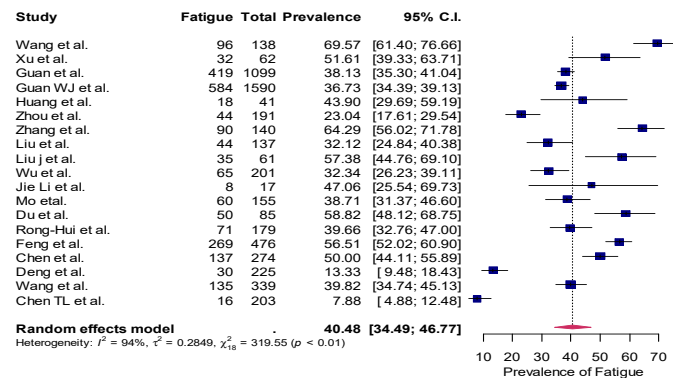

## D. Anorexia

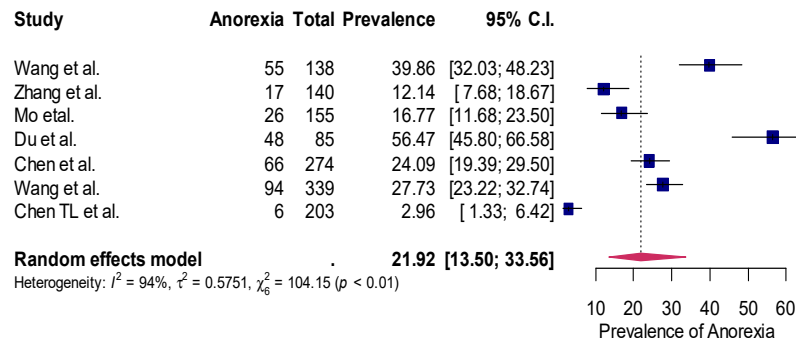

## E. Myalgia

## F. Dyspnea

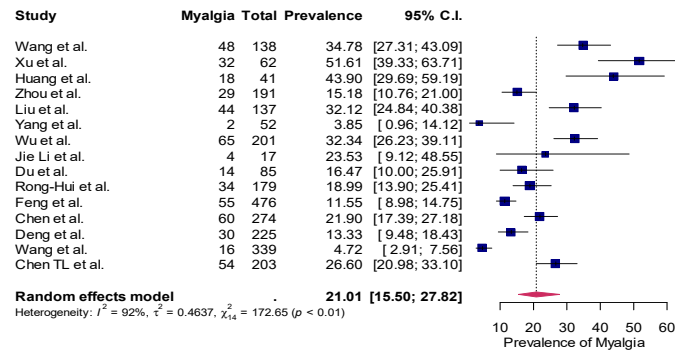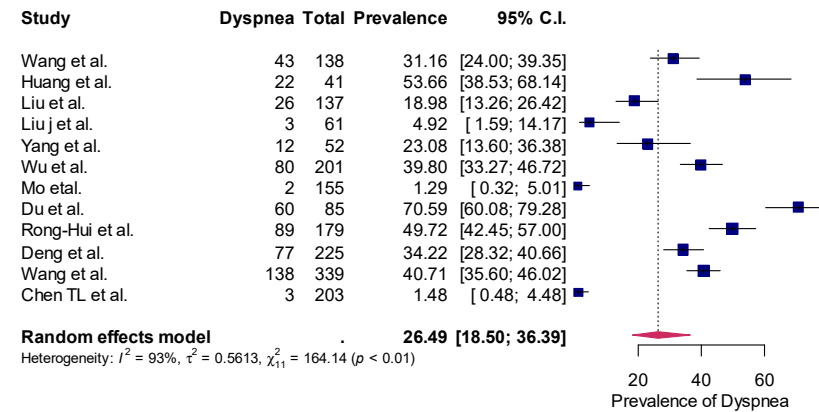

## G. Diarrhea

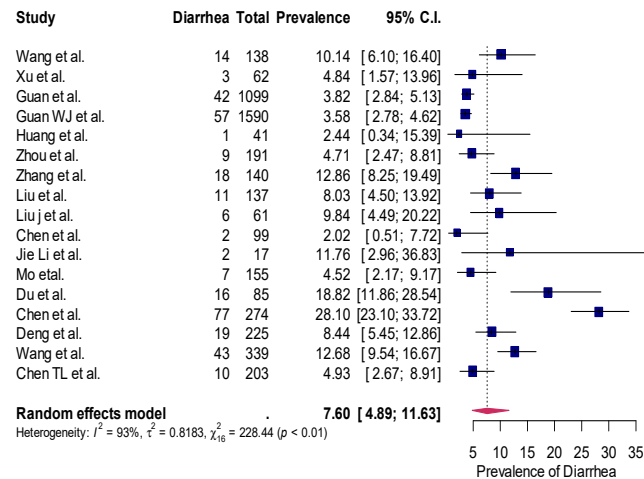

## H. Nausea

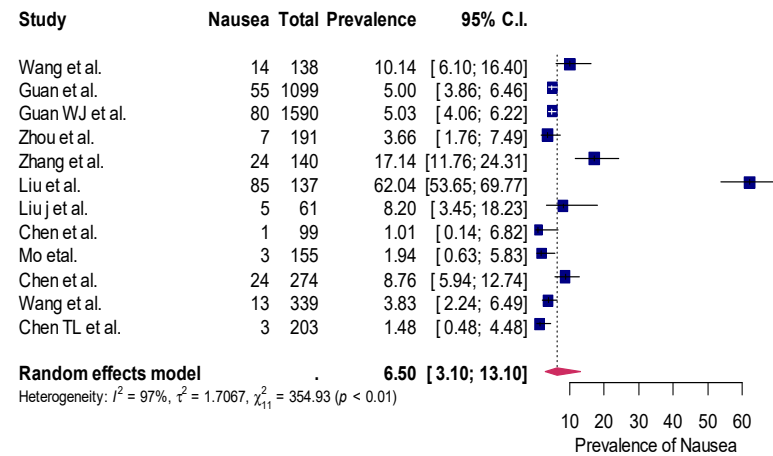

## I. Headache

## J. Hypertension

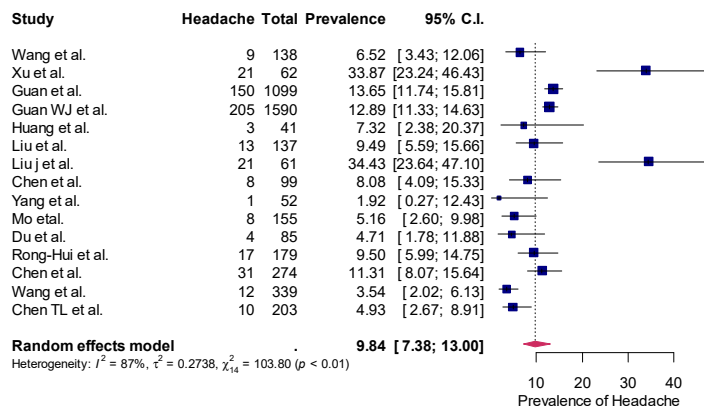

## K. Diabetes

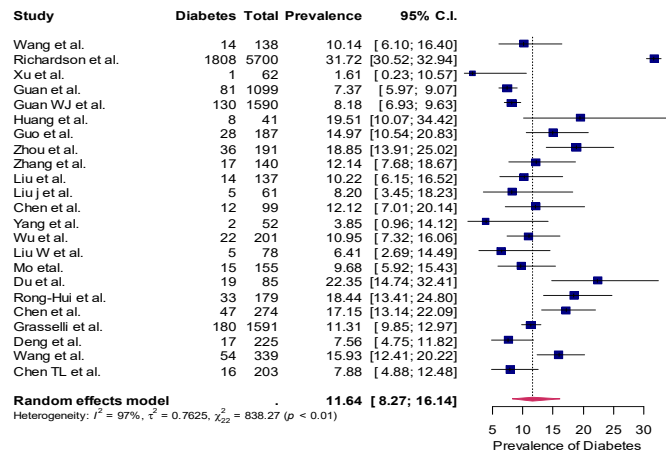

## M. Malignancy

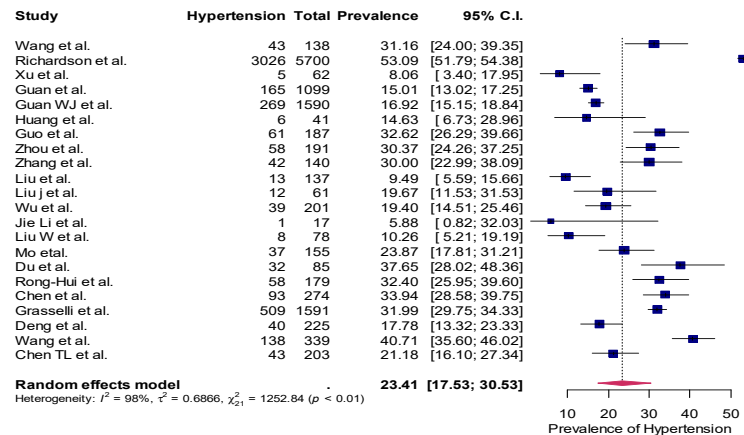

## L. CVD

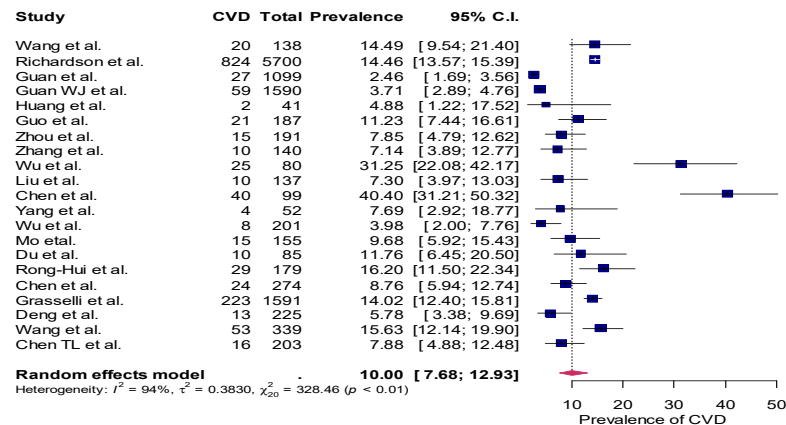

## N. COPD

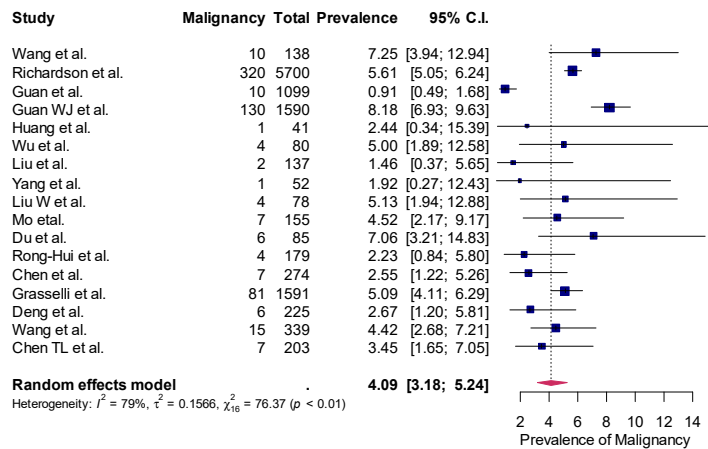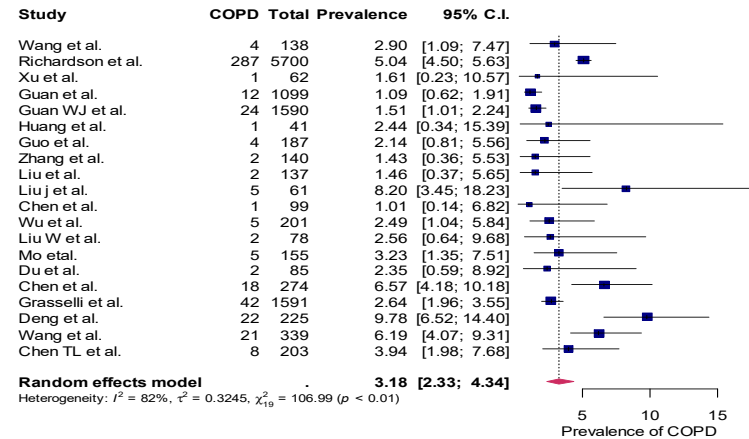

## O. CERD

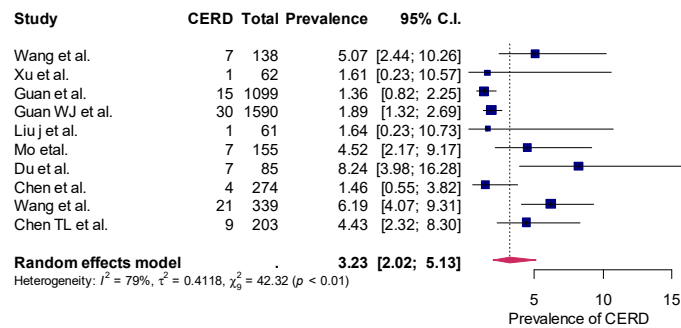

## P. CKD

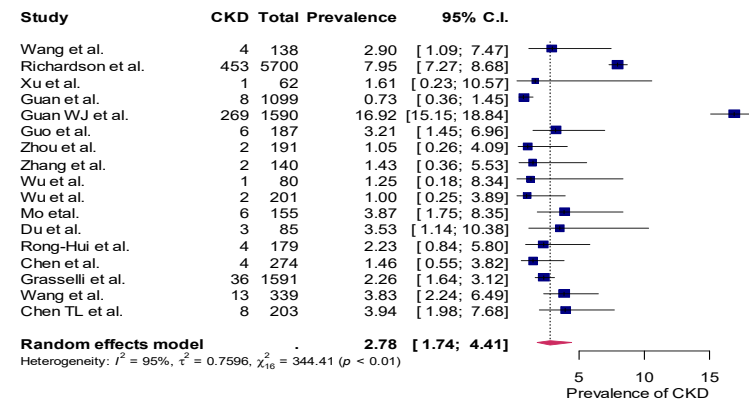

## Q. CLD

## R. Smoking

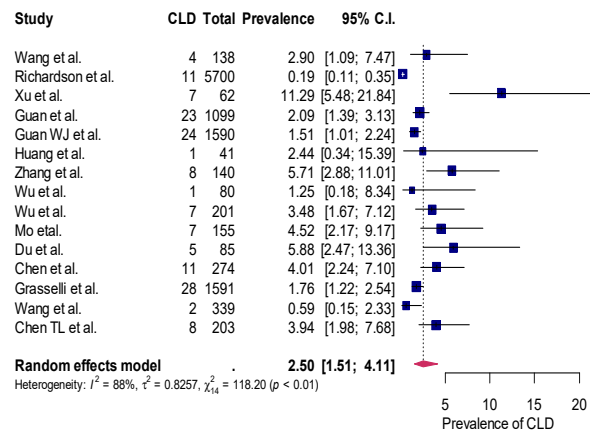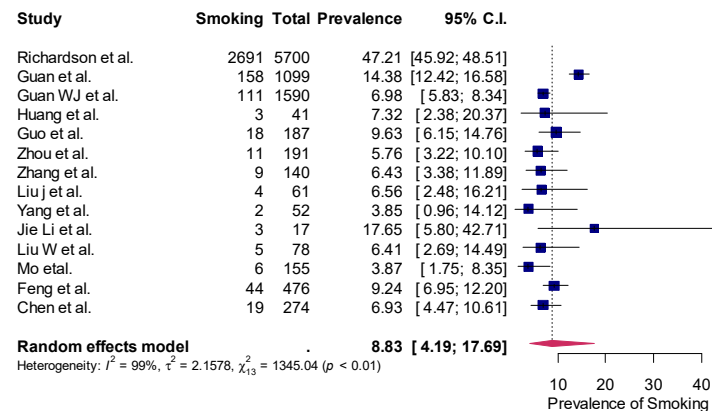

**Supplementary Figure S1: Meta-analysis of prevalence of comorbidities and symptoms COVID-19 fatalities.**

**A. Fever**

**B. Cough**

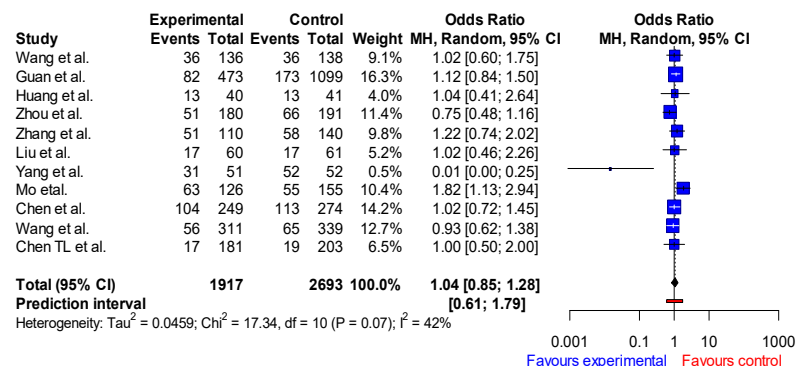

## C. Fatigue

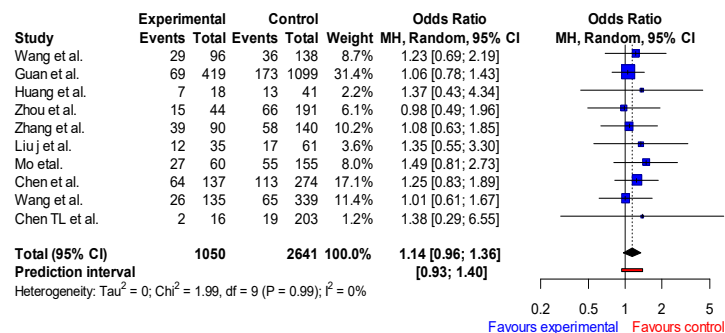

## E. Myalgia

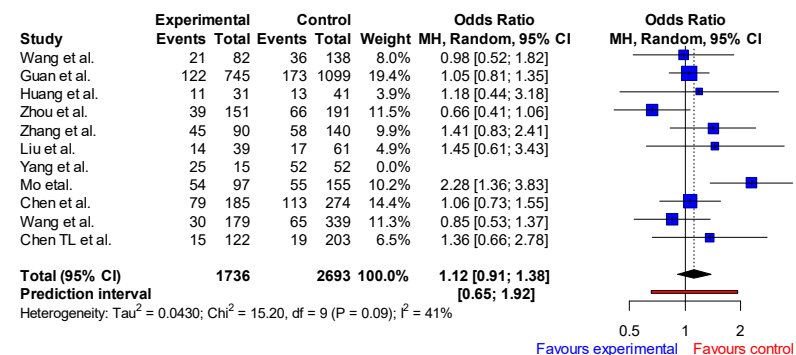

## D. Anorexia

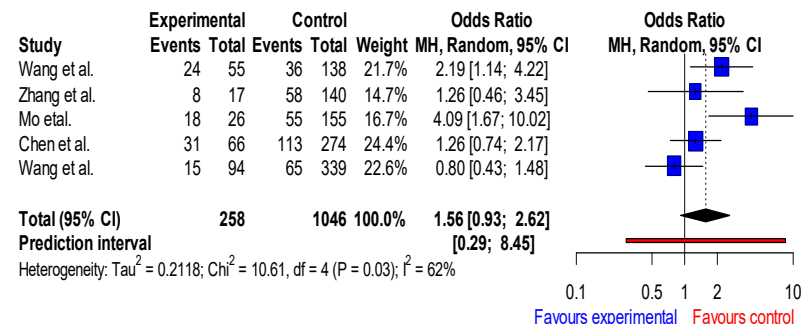

## F. Dyspnea

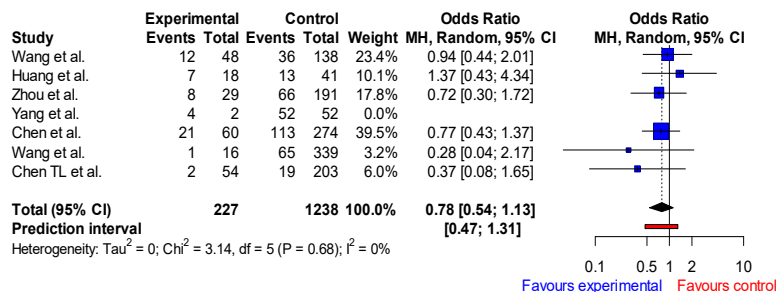

## G. Diarrhea

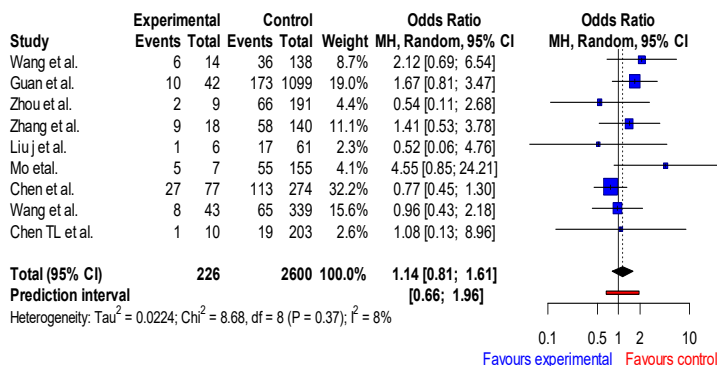

## I. Headache

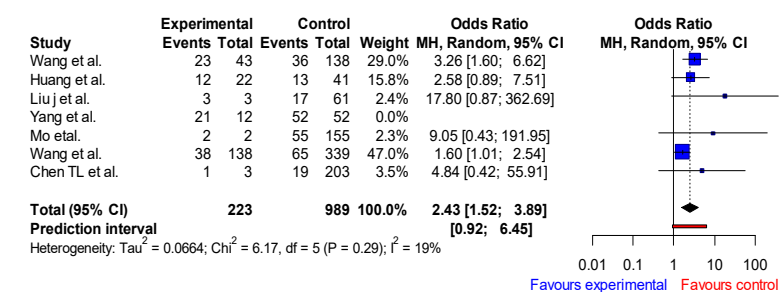

## H. Nausea

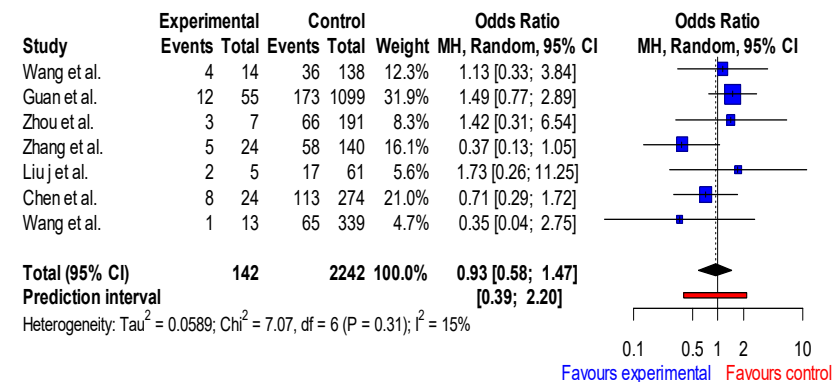

## J. Hypertension

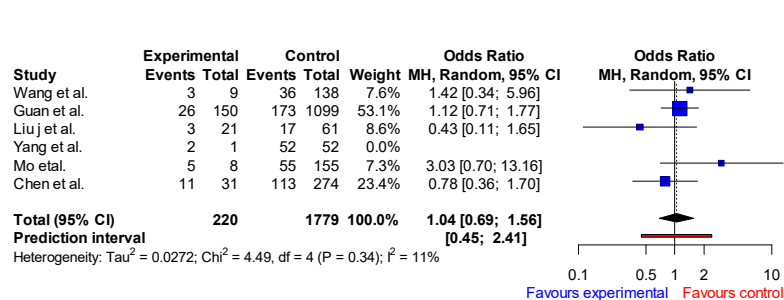

## K. Diabetes

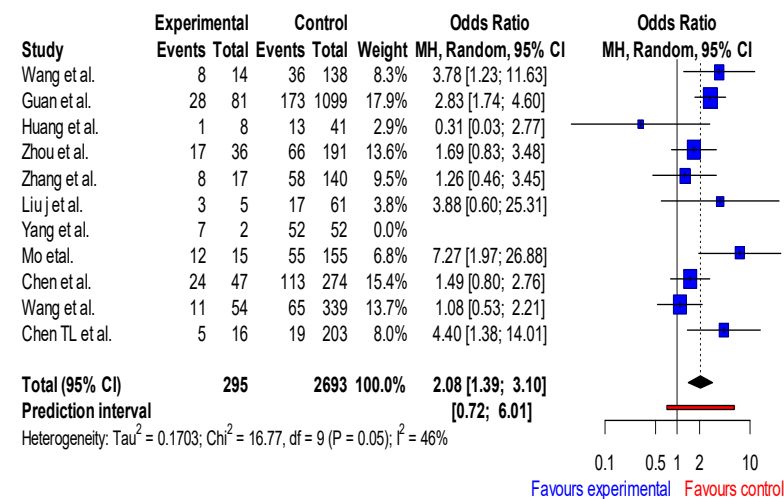

## M. Malignancy

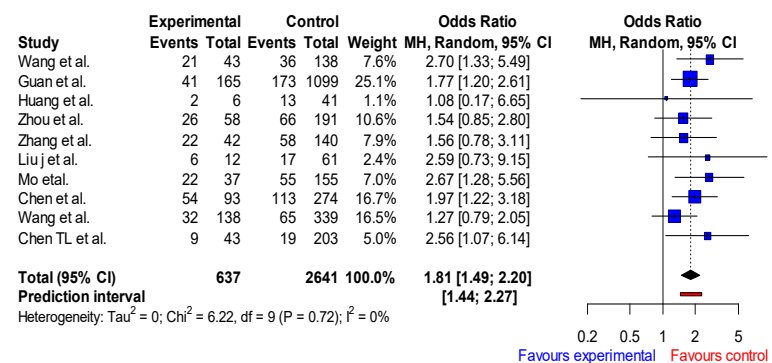

## L. CVD

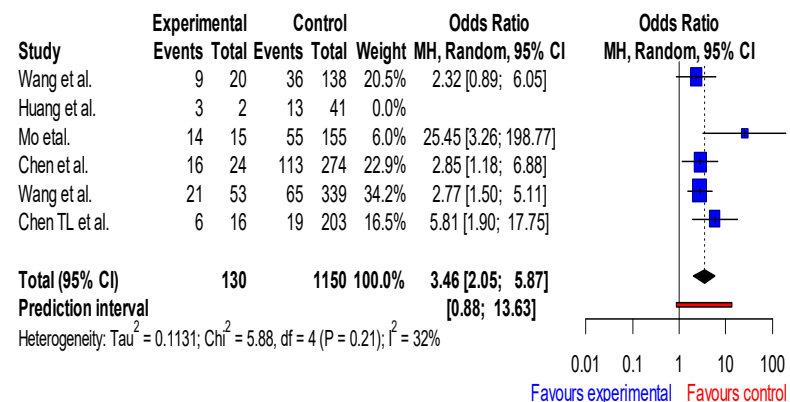

## N. COPD



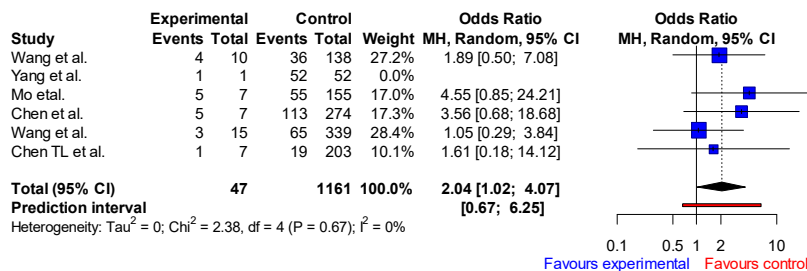

## O. CERD

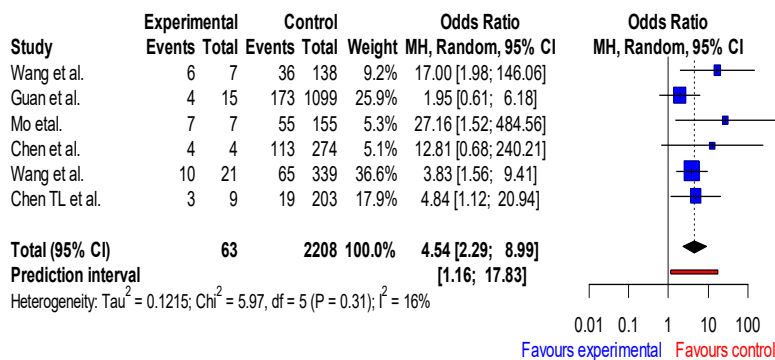

## Q. Smoking

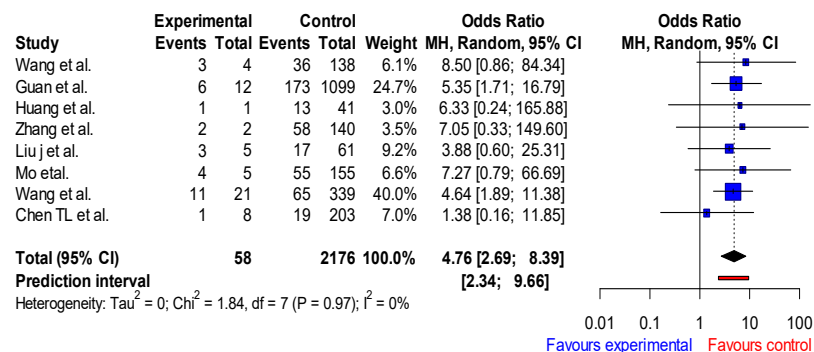

## P. CKD

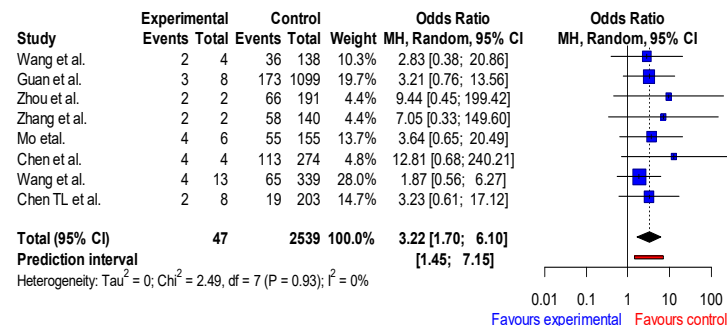

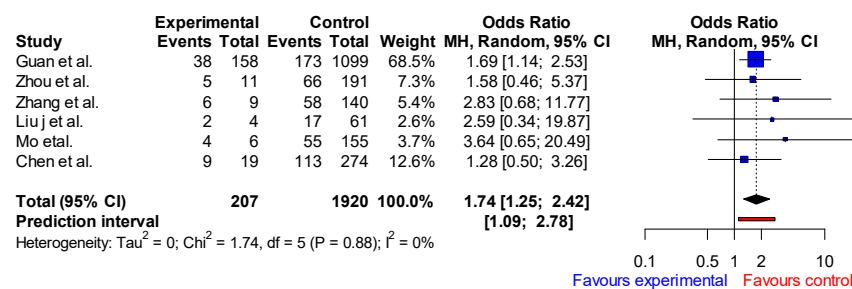

**Supplementary Figure S2: Meta-analysis of severity of comorbidities and symptoms in COVID-19 fatalities**

**A. Fever**

**B. Cough**

**C. Fatigue**

**D. Dyspnea**

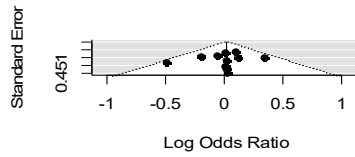

**Egger's test:  $p = 0.479$**

**E. Myalgia**

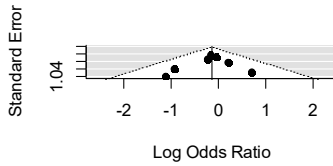

**Egger's test:  $p = 0.685$**

**I. Headache**

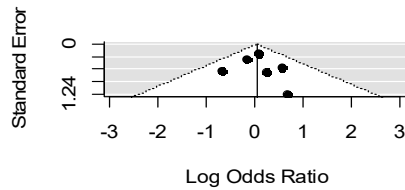

**Egger's test:  $p = 0.832$**

**M. Malignancy**

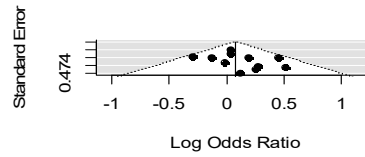

**Egger's test:  $p = 0.354$**

**F. Anorexia**

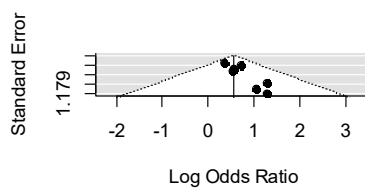

**Egger's test:  $p = 0.018$**

**J. Hypertension**

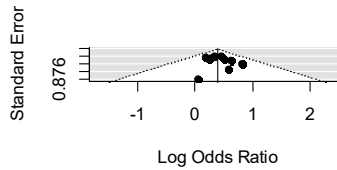

**Egger's test:  $p = 0.551$**

**N. CRED**

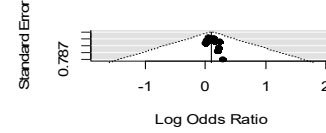

**Egger's test:  $p = 0.183$**

**G. Diarrhea**

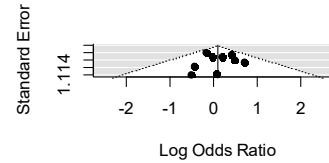

**Egger's test:  $p = 0.731$**

**K. Diabetes**

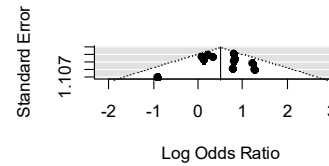

**Egger's test:  $p = 0.949$**

**O. Smoking**

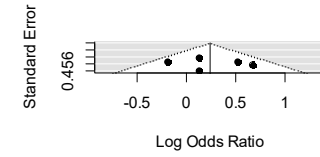

**Egger's test:  $p = 0.774$**

**H. Nausea**

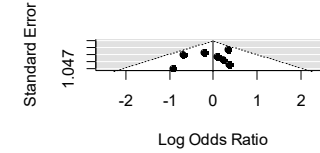

**Egger's test:  $p = 0.458$**

**L. CVD**

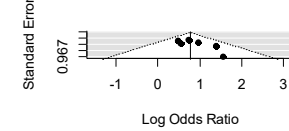

**Egger's test:  $p = 0.141$**

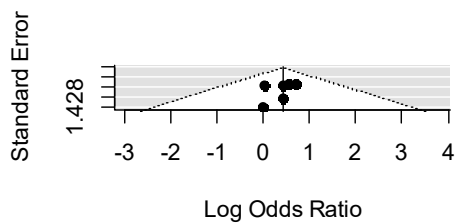

**Egger's test:  $p=0.466$**

**P. CKD**

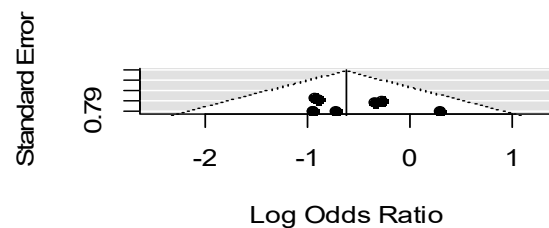

**Egger's test:  $p=0.593$**

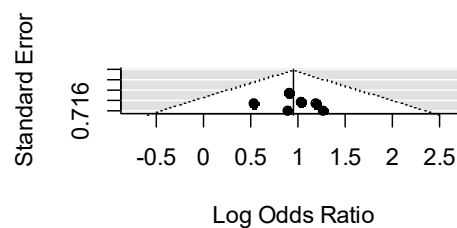

**Egger's test:  $p=0.633$**

**Q. COPD**

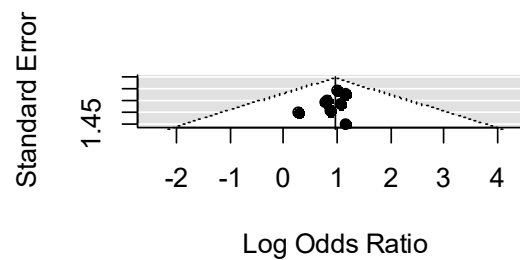

**Egger's test:  $p=0.235$**

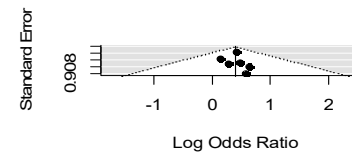

**Egger's test:  $p=0.916$**

**Supplementary Figure S3: Assessment of publication bias using funnel plot and Egger's test**

**Supplementary Table S1: Accuracy and Evaluation matrices for symptoms data in ML analysis**

| Algorithms    | Accuracy | Precision | Recall | f1 Score | AUC  | Log loss |
|---------------|----------|-----------|--------|----------|------|----------|
| Random Forest | 0.87     | 0.89      | 0.93   | 0.91     | 0.83 | 4.52     |
| Decision Tree | 0.87     | 0.9       | 0.93   | 0.91     | 0.84 | 4.37     |
| XGB           | 0.89     | 0.92      | 0.93   | 0.92     | 0.87 | 3.77     |
| GBM           | 0.9      | 0.93      | 0.94   | 0.93     | 0.88 | 3.32     |
| SVM           | 0.89     | 0.93      | 0.91   | 0.92     | 0.87 | 3.92     |
| Light GBM     | 0.9      | 0.94      | 0.91   | 0.93     | 0.89 | 3.47     |

Note: XGB= XGBoost; GBM= Gradient Boosting Machine; SVM= Support Vector Machine

**Supplementary Table S2: Accuracy and Evaluation matrices for comorbidity data in ML analysis**

| Algorithms    | Accuracy | Precision | Recall | F1 Score | AUC  | Log loss |
|---------------|----------|-----------|--------|----------|------|----------|
| Random Forest | 0.87     | 0.89      | 0.93   | 0.91     | 0.82 | 4.52     |
| Decision Tree | 0.83     | 0.85      | 0.92   | 0.88     | 0.76 | 5.88     |
| XGB           | 0.86     | 0.89      | 0.92   | 0.9      | 0.82 | 4.83     |
| GBM           | 0.84     | 0.92      | 0.86   | 0.89     | 0.83 | 5.43     |
| SVM           | 0.87     | 0.91      | 0.91   | 0.91     | 0.84 | 4.52     |
| Light GBM     | 0.88     | 0.9       | 0.93   | 0.92     | 0.84 | 4.22     |

Note: XGB= XGBoost; GBM= Gradient Boosting Machine; SVM= Support Vector Machine

**Supplementary Table S3: Coefficient values for each symptom applying after ML methods**

| Algorithms    | Headache | Fever | Cough | Fatigue | Nausea | Diarrhea | Myalgia | Dyspnea | Pneumonia | ARDS | Septic Shock |
|---------------|----------|-------|-------|---------|--------|----------|---------|---------|-----------|------|--------------|
| Random Forest | 0.3      | 1.89  | 1.74  | 0.61    | 0.18   | 0.16     | 0.71    | 2.94    | 76.62     | 4.77 | 0.69         |
| Decision Tree | 0.28     | 2.19  | 1.28  | 0.9     | 0.4    | 0.07     | 0.68    | 1.78    | 4.3       | 3.66 | 0.17         |
| XGB           | 0        | 6.67  | 6.74  | 3.81    | 0      | 0        | 3.2     | 13.34   | 19.7      | 25.4 | 1.92         |
| GBM           | 0.74     | 1.6   | 0.95  | 0.34    | 0.07   | 0.04     | 0.56    | 3.07    | 9.18      | 7.22 | 0.8          |
| SVM           | 0        | 24.53 | 25.3  | 10.7    | 10.7   | 10.7     | 8.22    | 21.74   | 58.67     | 42.5 | 5.52         |
| Light GBM     | 0        | 39.77 | 21.02 | 0       | 0      | 0        | 0       | 34.84   | 95.68     | 37.7 | 0.16         |

Note: ARDS= Acute respiratory distress syndrome

**Supplementary Table S4: Coefficient values for each comorbidity applying after ML methods**

| Algorithms    | Gender | Age     | Hypertension | CVD   | CEVD  | Chronic Lung Disease | Malignancy | Diabetes and Metabolic Disease | CLD  | CKD  | Neurodegenerative Disease | Infectious Disease | Surgical History | COPD | Asthma |
|---------------|--------|---------|--------------|-------|-------|----------------------|------------|--------------------------------|------|------|---------------------------|--------------------|------------------|------|--------|
| Random Forest | 2.56   | 82.9    | 5.53         | 1.06  | 0.27  | 0.35                 | 0.65       | 3.67                           | 0.13 | 1.13 | 0.27                      | 0.03               | 0.43             | 0.82 | 0.19   |
| Decision Tree | 4.05   | 85.51   | 2.57         | 0.49  | 0.28  | 0.45                 | 0.88       | 3.77                           | 0    | 0.81 | 0                         | 0.007              | 0.55             | 0.52 | 0.1    |
| XGB           | 9.37   | 20.77   | 14.84        | 5.98  | 0     | 2.9                  | 7.37       | 14.21                          | 0    | 7    | 0                         | 0                  | 0                | 5.77 | 11.8   |
| GBM           | 2.19   | 77.78   | 6.48         | 1.37  | 0.27  | 0.23                 | 0.73       | 7.72                           | 0.09 | 0.87 | 0.46                      | 0.05               | 0.64             | 1.02 | 0.09   |
| SVM           | 4.07   | 169.3   | 34           | 10.18 | 23.89 | 11.66                | 0          | 33.58                          | 22.7 | 29.2 | 14                        | 15.78              | 8.34             | 25.4 | 24.15  |
| Light GBM     | 54.6   | 1448.16 | 114.62       | 0.81  | 0     | 0                    | 0          | 46.38                          | 0    | 3.53 | 0                         | 0                  | 0                | 0    | 0      |

Note: CVD= Cardiovascular disease; COPD=Chronic obstructive pulmonary disease; CEVD= Cerebrovascular disease; CKD=Chronic Kidney Disease; CLD= Chronic lung disease;

**Supplementary Table S5: Assessing association between comorbidity and symptoms using Fisher's exact test of deceased patients**

| Comorbidity         | Symptoms              | P value | Comorbidity       | Symptoms              | P value |
|---------------------|-----------------------|---------|-------------------|-----------------------|---------|
| <b>Hypertension</b> | Headache              | 0.232   | <b>CEVD</b>       | Headache              | 1.00    |
|                     | Fever                 | 0.423   |                   | Fever                 | 0.408   |
|                     | Cough                 | 0.823   |                   | Cough                 | 0.318   |
|                     | Fatigue               | 0.665   |                   | Fatigue               | 1.00    |
|                     | Nausea or vomiting    | 0.232   |                   | Nausea or vomiting    | 1.00    |
|                     | Diarrhea              | 1.00    |                   | Diarrhea              | 1.00    |
|                     | Myalgia or arthralgia | 1.00    |                   | Myalgia or arthralgia | 0.037   |
|                     | Dyspnea               | <0.001  |                   | Dyspnea               | 1.00    |
|                     | Pneumonia             | <0.001  |                   | Pneumonia             | 0.191   |
|                     | ARDS                  | <0.001  |                   | ARDS                  | 1.00    |
|                     | Septic Shock          | <0.001  |                   | Septic Shock          | 0.187   |
| <b>Diabetes</b>     | Headache              | 0.179   | <b>CLD</b>        | Headache              | 1.00    |
|                     | Fever                 | 0.374   |                   | Fever                 | 1.00    |
|                     | Cough                 | 0.444   |                   | Cough                 | 0.008   |
|                     | Fatigue               | 0.613   |                   | Fatigue               | 1.00    |
|                     | Nausea or vomiting    | 1.00    |                   | Nausea or vomiting    | 1.00    |
|                     | Diarrhea              | 0.179   |                   | Diarrhea              | 1.00    |
|                     | Myalgia or arthralgia | 0.447   |                   | Myalgia or arthralgia | 1.00    |
|                     | Dyspnea               | <0.001  |                   | Dyspnea               | 0.022   |
|                     | Pneumonia             | <0.001  |                   | Pneumonia             | 1.00    |
|                     | ARDS                  | <0.001  |                   | ARDS                  | 1.00    |
|                     | Septic Shock          | 0.047   |                   | Septic Shock          | 1.00    |
| <b>CVD</b>          | Headache              | 1.00    | <b>Malignancy</b> | Headache              | 1.00    |
|                     | Fever                 | 0.117   |                   | Fever                 | 1.00    |
|                     | Cough                 | 0.169   |                   | Cough                 | 1.00    |
|                     | Fatigue               | 1.00    |                   | Fatigue               | 0.085   |
|                     | Nausea or vomiting    | 1.00    |                   | Nausea or vomiting    | 1.00    |
|                     | Diarrhea              | 1.00    |                   | Diarrhea              | 1.00    |
|                     | Myalgia or arthralgia | 1.00    |                   | Myalgia or arthralgia | 1.00    |
|                     | Dyspnea               | 0.075   |                   | Dyspnea               | 1.00    |
|                     | Pneumonia             | 0.001   |                   | Pneumonia             | 0.191   |
|                     | ARDS                  | 0.017   |                   | ARDS                  | 0.567   |
|                     | Septic Shock          | 0.039   |                   | Septic Shock          | 0.187   |

**Supplementary Table S5: Assessing association between comorbidity and symptoms using Fisher's exact test of deceased patients (continued...)**

| Comorbidity               | Symptoms              | P value | Comorbidity      | Symptoms              | P value |
|---------------------------|-----------------------|---------|------------------|-----------------------|---------|
| Liver Disease             | Headache              | 1.00    | Surgical History | Headache              | 1.00    |
|                           | Fever                 | 1.00    |                  | Fever                 | 1.00    |
|                           | Cough                 | 0.008   |                  | Cough                 | 1.00    |
|                           | Fatigue               | 1.00    |                  | Fatigue               | 0.022   |
|                           | Nausea or vomiting    | 1.00    |                  | Nausea or vomiting    | 1.00    |
|                           | Diarrhea              | 1.00    |                  | Diarrhea              | 1.00    |
|                           | Myalgia or arthralgia | 1.00    |                  | Myalgia or arthralgia | 1.00    |
|                           | Dyspnea               | 0.022   |                  | Dyspnea               | 1.00    |
|                           | Pneumonia             | 1.00    |                  | Pneumonia             | 1.00    |
|                           | ARDS                  | 1.00    |                  | ARDS                  | 1.00    |
|                           | Septic Shock          | 1.00    |                  | Septic Shock          | 1.00    |
| COPD                      | Headache              | 0.019   | Asthma           | Headache              | 1.00    |
|                           | Fever                 | 0.546   |                  | Fever                 | 0.481   |
|                           | Cough                 | 0.438   |                  | Cough                 | 0.381   |
|                           | Fatigue               | 0.126   |                  | Fatigue               | 1.00    |
|                           | Nausea or vomiting    | 1.00    |                  | Nausea or vomiting    | 1.00    |
|                           | Diarrhea              | 1.00    |                  | Diarrhea              | 1.00    |
|                           | Myalgia or arthralgia | 1.00    |                  | Myalgia or arthralgia | 1.00    |
|                           | Dyspnea               | 0.224   |                  | Dyspnea               | 0.1645  |
|                           | Pneumonia             | 0.018   |                  | Pneumonia             | 0.062   |
|                           | ARDS                  | 0.083   |                  | ARDS                  | <0.001  |
|                           | Septic Shock          | 0.268   |                  | Septic Shock          | 0.2281  |
| Neurodegenerative Disease | Headache              | 1.00    | CKD              | Headache              | 0.056   |
|                           | Fever                 | 0.015   |                  | Fever                 | 0.708   |
|                           | Cough                 | 0.008   |                  | Cough                 | 1.00    |
|                           | Fatigue               | 0.043   |                  | Fatigue               | 0.337   |
|                           | Nausea or vomiting    | 1.00    |                  | Nausea or vomiting    | 1.00    |
|                           | Diarrhea              | 1.00    |                  | Diarrhea              | 1.00    |
|                           | Myalgia or arthralgia | 1.00    |                  | Myalgia or arthralgia | 1.00    |
|                           | Dyspnea               | 0.022   |                  | Dyspnea               | 0.164   |
|                           | Pneumonia             | 1.00    |                  | Pneumonia             | <0.001  |
|                           | ARDS                  | 1.00    |                  | ARDS                  | <0.001  |
|                           | Septic Shock          | 1.00    |                  | Septic Shock          | 0.0087  |

**Supplementary Table S6: The distribution of patients' according to countries**

| Country     | Count  |
|-------------|--------|
| Italy       | 158090 |
| USA         | 122453 |
| China       | 42531  |
| Russia      | 32761  |
| UK          | 17837  |
| Spain       | 16273  |
| Ecuador     | 10947  |
| France      | 10160  |
| South Korea | 7198   |
| Iran        | 7044   |
| Germany     | 6684   |
| Egypt       | 4636   |



|                      |      |
|----------------------|------|
| South Africa         | 4542 |
| Austria              | 4242 |
| Netherlands          | 4150 |
| Brazil               | 4021 |
| Belgium              | 3747 |
| Chile                | 2739 |
| Mexico               | 2112 |
| Portugal             | 2063 |
| Japan                | 2035 |
| Canada               | 1721 |
| Philippines          | 1512 |
| Algeria              | 1268 |
| Argentina            | 1137 |
| Cuba                 | 854  |
| Niger                | 766  |
| Switzerland          | 732  |
| Nigeria              | 668  |
| Norway               | 658  |
| Sweden               | 637  |
| Australia            | 561  |
| Singapore            | 430  |
| Uruguay              | 415  |
| Colombia             | 377  |
| Ghana                | 367  |
| Kenya                | 337  |
| Poland               | 325  |
| Kazakhstan           | 302  |
| Denmark              | 250  |
| Thailand             | 119  |
| Paraguay             | 113  |
| Hong Kong            | 102  |
| Ethiopia             | 98   |
| Kuwait               | 93   |
| Bahrain              | 85   |
| Bolivia              | 81   |
| Puerto Rico          | 69   |
| Georgia              | 68   |
| United Arab Emirates | 61   |
| Malaysia             | 57   |

|                |    |
|----------------|----|
| Oman           | 55 |
| Rwanda         | 54 |
| Vietnam        | 50 |
| Guatemala      | 50 |
| Malta          | 49 |
| India          | 40 |
| Iraq           | 36 |
| Taiwan         | 34 |
| Iceland        | 34 |
| Zimbabwe       | 30 |
| Greece         | 29 |
| Romania        | 25 |
| Israel         | 23 |
| Qatar          | 18 |
| Reunion        | 18 |
| Ireland        | 14 |
| Namibia        | 14 |
| Lebanon        | 13 |
| Pakistan       | 12 |
| Senegal        | 12 |
| Peru           | 10 |
| New Zealand    | 10 |
| Afghanistan    | 9  |
| Finland        | 8  |
| Saudi Arabia   | 8  |
| Croatia        | 7  |
| Gambia         | 6  |
| Azerbaijan     | 6  |
| Guyana         | 5  |
| Kosovo         | 5  |
| Benin          | 5  |
| Czech Republic | 4  |
| Morocco        | 4  |
| Maldives       | 4  |
| Cameroon       | 4  |
| Burkina Faso   | 4  |
| Nepal          | 3  |
| Sri Lanka      | 3  |
| Ukraine        | 3  |

|                      |   |
|----------------------|---|
| Luxembourg           | 3 |
| Cambodia             | 3 |
| San Marino           | 2 |
| Tunisia              | 2 |
| Jordan               | 2 |
| Bosnia               | 2 |
| Congo                | 2 |
| Venezuela            | 2 |
| Sudan                | 2 |
| Guinea               | 2 |
| Armenia              | 2 |
| Bhutan               | 2 |
| Panama               | 2 |
| Mongolia             | 2 |
| Virgin Islands, U.S. | 2 |
| Moldova              | 1 |
| North Macedonia      | 1 |
| Estonia              | 1 |
| Lithuania            | 1 |
| Latvia               | 1 |
| Andorra              | 1 |
| Liechtenstein        | 1 |
| Serbia               | 1 |
| Gibraltar            | 1 |
| Slovenia             | 1 |
| Saint Vincent        | 1 |
